# Supplementary material for: Hidden bias in the DUD-E dataset leads to misleading performance of deep learning in structure-based virtual screening
Source: PLoS One. 2019 Aug 20;14(8):e0220113. doi: 10.1371/journal.pone.0220113 (PMC6701836; doi:10.1371/journal.pone.0220113)
Supplement: S1 Table — There are 35 atom types (channels) in total: the first 16 channels are from the receptor, and the remaining 19 channels are from the ligand. (XLSX) [file pone.0220113.s011.xlsx]

## Sheet: Sheet1
Receptor Atom Types	Ligand Atom Types
AliphaticCarbonXSHydrophobe	AliphaticCarbonXSHydrophobe
AliphaticCarbonXSNonHydrophobe	AliphaticCarbonXSNonHydrophobe
AromaticCarbonXSHydrophobe	AromaticCarbonXSHydrophobe
AromaticCarbonXSNonHydrophobe	AromaticCarbonXSNonHydrophobe
Calcium	Bromine
Iron	Chlorine
Magnesium	Fluorine
Nitrogen	Nitrogen
NitrogenXSAcceptor	NitrogenXSAcceptor
NitrogenXSDonor	NitrogenXSDonor
NitrogenXSDonorAcceptor	NitrogenXSDonorAcceptor
OxygenXSAcceptor	Oxygen
OxygenXSDonorAcceptor	OxygenXSAcceptor
Phosphorus	OxygenXSDonorAcceptor
Sulfur	Phosphorus
Zinc	Sulfur
	SulfurAcceptor
	Iodine
	Boron
